# Supplementary material
Source: HighWire-hosted journal article supplement (https://ard.bmj.com/highwire/filestream/203053/field_highwire_adjunct_files/0/Table_S1.docx)
Supplement: Table_S1.docx [file Table_S1.docx]

Supplementary Table S1: Summary of surface markers used to define of lymphocyte subsets

| Cell types | | markers | subsets | | markers | subsets | markers |
| --- | --- | --- | --- | --- | --- | --- | --- |
| B cell | CD19+ | | Antigen inexperienced B | CD27- IgD+ | | Mature Naïve B | CD38low |
|  |  | |  |  | | pre-naïve B | CD38Intermediate CD5+ |
|  |  | |  |  | | Transitional T1 B | CD38highCD5+ |
|  |  | | Pre- switch memory B | CD27+ IgD+ | |  |  |
|  |  | | Double negative B | CD27-IgD- | |  |  |
|  |  | | Post-switch memory B | CD27+IgD- | |  |  |
|  |  | | Plasmablasts/ plasma cells | CD27highIgD-CD38bright | |  |  |
|  |  | | Pre-switch B | IgD+, IgM+ | |  |  |
|  |  | | Post-switch B | IgD-, IgG+ or IgA+ | |  |  |
| Non B | CD19- | | All lymphocyte subsets except CD19+ B cells |  | |  |  |
| T cell | CD4+ | | Naive | CCR7+CD45RA+CD45RO- | |  |  |
|  |  | | Central memory | CCR7+CD45RA-CD45RO+ | |  |  |
|  |  | | Effector memory | CCR7-CD45RA-CD45RO+ | |  |  |
|  | CD8+ | | Naive | CCR7+CD45RA+CD45RO- | |  |  |
|  |  | | Central memory | CCR7+CD45RA-CD45RO+ | |  |  |
|  |  | | Effector memory | CCR7-CD45RA-CD45RO+ | |  |  |
|  |  | | Terminal effector memory | CCR7-CD45RA+CD45RO- | |  |  |
|  | TCRab+CD4-CD8- | | Double negative T |  | |  |  |
| NK T | CD56+CD3+ | |  |  | |  |  |
| NK | CD56+CD3- | |  |  | |  |  |
| Plasmacytoid dendritic cells | CD123+CD11c-HLADR+ | |  |  | |  |  |
